# Supplementary material for: The Hippo-Salvador signaling pathway regulates renal tubulointerstitial fibrosis
Source: PubMed Central journal article supplement (PMC4994041; doi:10.1038/srep31931), 2016-08-23
Supplement: srep31931-s1.pdf [file srep31931-s1.pdf]

# **The Hippo-Salvador signaling pathway regulates renal tubulointerstitial fibrosis**

Eunjeong Seo, Wan-Young Kim, Jeongmi Hur, Hanbyul Kim, Sun Ah Nam, Arum Choi, Yu-Mi Kim, Sang Hee Park, Chaeuk Chung, Jin Kim, Soohong Min, Seung-Jae Myung, Dae-Sik Lim and Yong Kyun Kim

# Supplementary figures 1

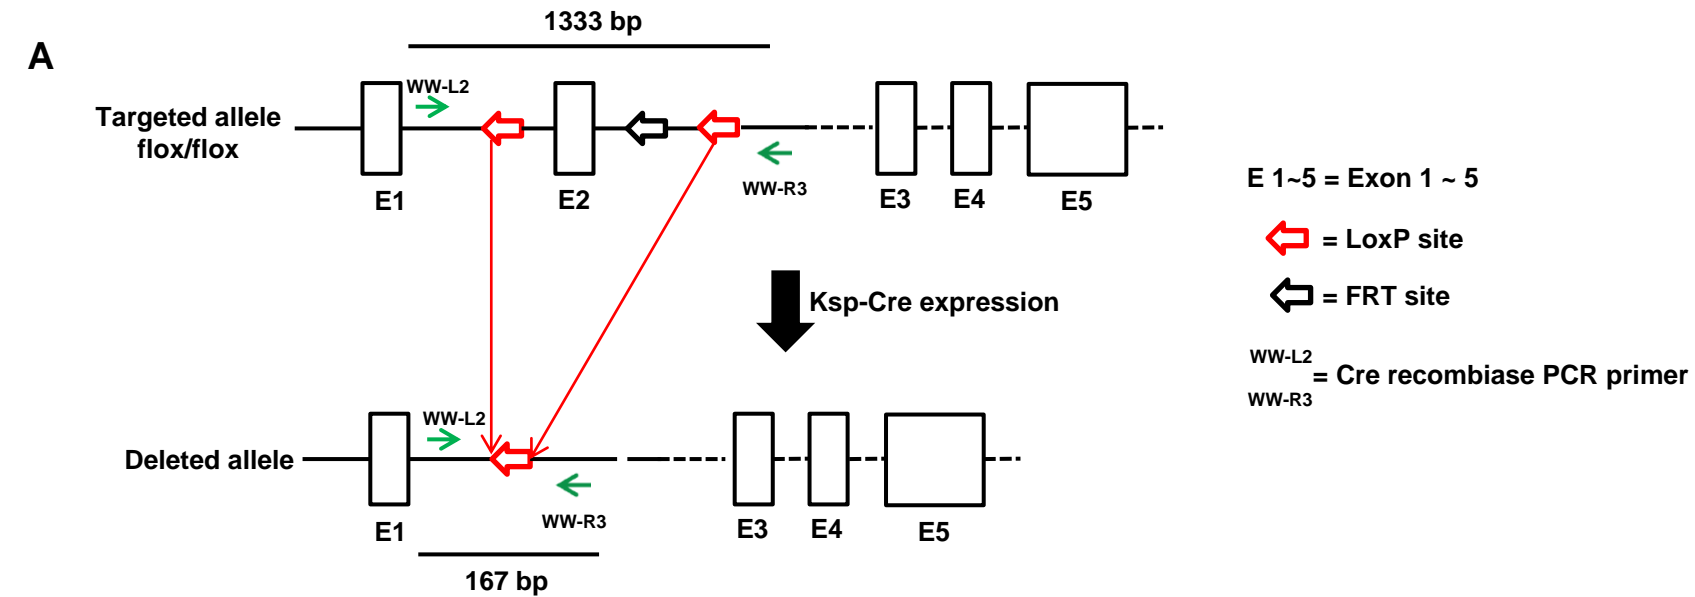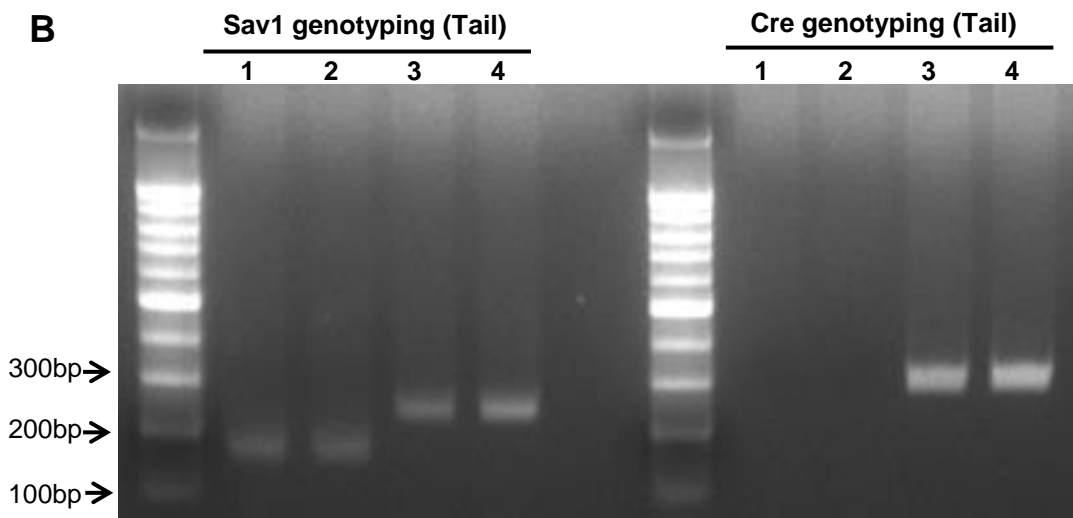

1. Sav1 +/+      3. Sav1<sup>F/F</sup> ; Ksp-cre

2. Sav1 +/+      4. Sav1<sup>F/F</sup> ; Ksp-cre

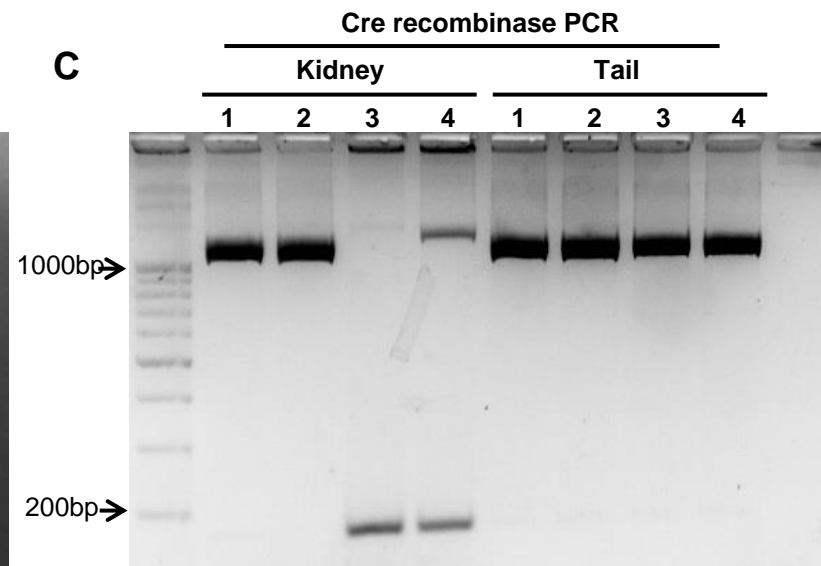

1. Sav1 +/+      3. Sav1<sup>F/F</sup> ; Ksp-cre

2. Sav1 +/+      4. Sav1<sup>F/F</sup> ; Ksp-cre

## Supplementary figures 2

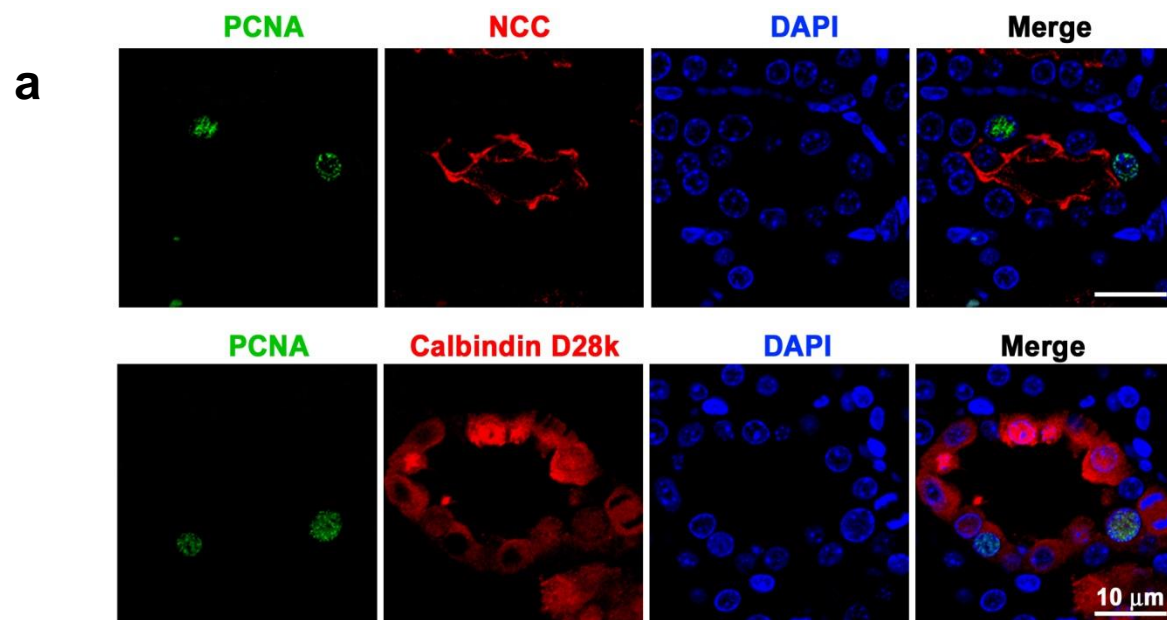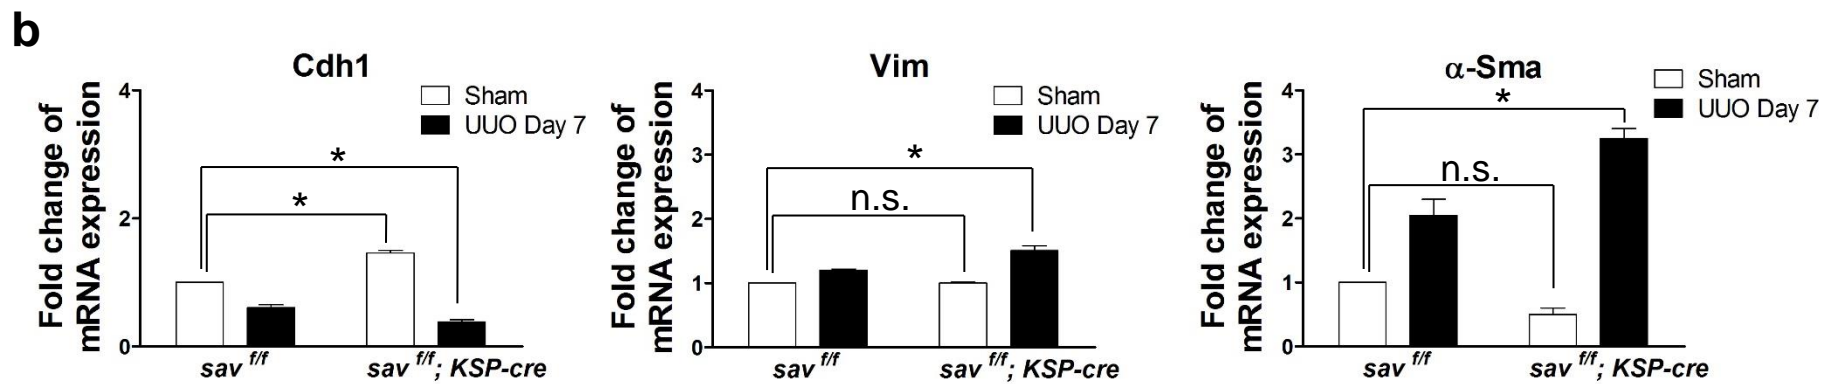

## Supplementary figures 3

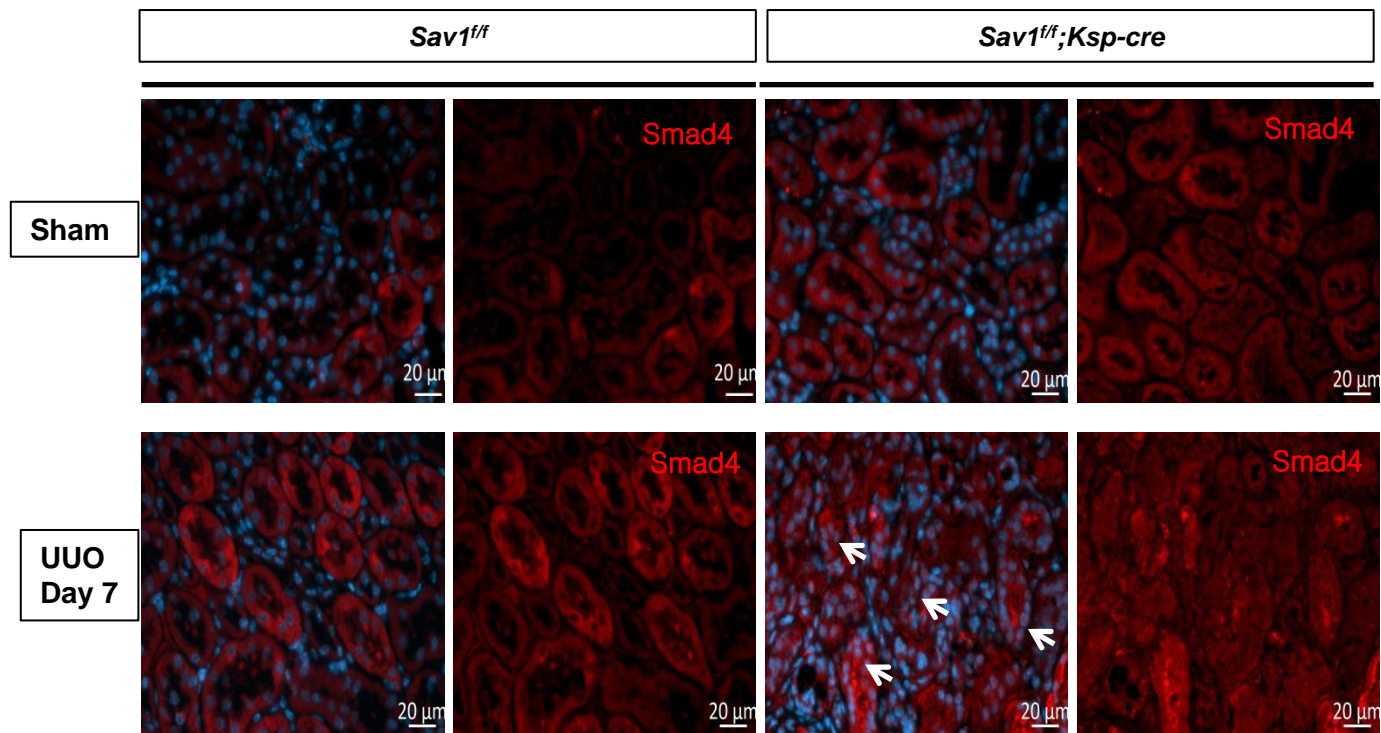

## Supplementary figures 4

### Oligos

|                               |                            |
|-------------------------------|----------------------------|
| Col1A1_F                      | ATCAACCGGAGGAATTTCCGT      |
| Col1A1_R                      | CACCAGGACGACCAGGTTTTC      |
| Col3A1_F                      | GCCAAATATGTGTCTGTGACTCA    |
| Col3A1_R                      | GGGCGAGTAGGAGCAGTTG        |
| aSMA_F                        | CTATGAGGGCTATGCCTTGCC      |
| aSMA_R                        | GCTCAGCAGTAGTAACGAAGGA     |
| CDH1_F                        | CGAGAGCTACACGTTACGG        |
| CDH1_R                        | GGGTGTCGAGGGAAAAATAGG      |
| VIM_F                         | GACGCCATCAACACCGAGTT       |
| VIM_R                         | CTTTGTGCTTGTTAGCTGGT       |
| SNAIL2_F                      | TGTGACAAGGAATATGTGAGCC     |
| SNAIL2_R                      | TGAGCCCTCAGATTTGACCTG      |
| NEGR1_F                       | AGAGTGAGCAGCCCTAGCAG       |
| NEGR1_R                       | GGGAAGTCCACACTCTGTCC       |
| hTGFbR2_F                     | GTAGCTCTGATGAGTGCAATGAC    |
| hTGFb2_R                      | CAGATATGGCAACTCCCAGTG      |
| hTGFbRII_CHIP F               | GCGCAAATGATTATGCAAGA       |
| hTGFbRII_CHIP R               | TTTGGTCAATTCACAACAGCTC     |
| hTGFbRII_F (luciferase assay) | CATAAAAAATATCAAAGGCAACCTCT |
| hTGFbRII_R (luciferase assay) | CAACTCCAGAAGCTTTGTTAATTTG  |
| Axin2_F                       | TGACTCTCCTTCCAGATCCCA      |
| Axin2_R                       | TGCCCACTAGGCTGACA          |
| TGFb2_F                       | CCATCCCGCCCACTTTCTAC       |
| TGFb2_R                       | AGCTCAATCCGTTGTTTCAGGC     |
| hTbRII_IF                     | CATAAAAAATATCAAAGGCAACCTCT |
| hTbRII_IR                     | CAACTCCAGAAGCTTTGTTAATTTG  |
| mTGFbR2_F                     | CCGCTGCATATCGTCTCTGTG      |
| mTGFbR2_R                     | AGTGGATGGATGGTCCTATTACA    |
| mTGFb2_F                      | TCGACATGGATCAGTTTATGCG     |
| mTGFb2_R                      | CCCTGGTACTGTTGTAGATGGA     |
